# Supplementary material for: PD-1 instructs a tumor-suppressive metabolic program that restricts glycolysis and restrains AP-1 activity in T cell lymphoma
Source: PubMed Central journal article supplement (PMC10597841; doi:10.1038/s43018-023-00635-7), 2023-09-18
Supplement: 43018_2023_635_MOESM1_ESM.pdf [file 43018_2023_635_MOESM1_ESM.pdf]

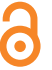

---

# **PD-1 instructs a tumor-suppressive metabolic program that restricts glycolysis and restrains AP-1 activity in T cell lymphoma**

---

In the format provided by the authors and unedited

## Exemplified Gating Strategy

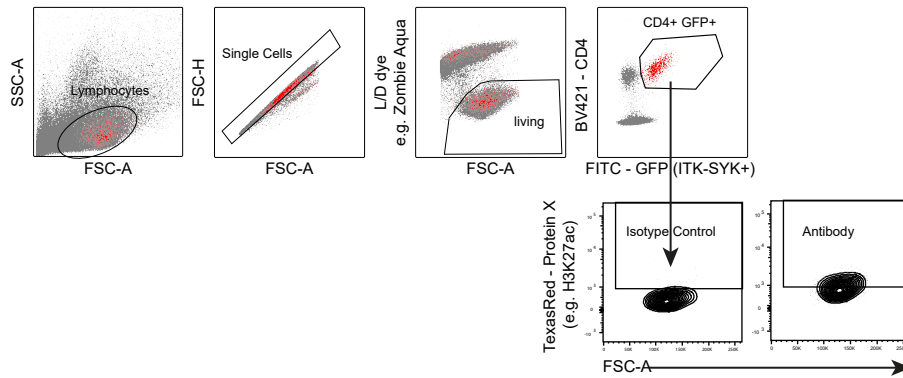

### Gating strategy for phosFlow analyses in murine/human tumor cells:

Gate 1: SSC-A and FSC-A were used to determine the lymphocyte gate depending on size

Gate 2: FSC-H and FSC-A were used to exclude duplets

Gate 3: a negative gate is used to exclude dead/dying cells

Gate 4: CD4+ and FITC+ gate was used to specifically detect tumor cells

Gate 5: proteins of interest; gates have been defined using isotype controls
