# Supplementary material for: PD-1 instructs a tumor-suppressive metabolic program that restricts glycolysis and restrains AP-1 activity in T cell lymphoma
Source: PubMed Central journal article supplement (PMC10597841; doi:10.1038/s43018-023-00635-7), 2023-09-18
Supplement: 43018_2023_635_MOESM2_ESM.pdf [file 43018_2023_635_MOESM2_ESM.pdf]

## Reporting Summary

Nature Portfolio wishes to improve the reproducibility of the work that we publish. This form provides structure for consistency and transparency in reporting. For further information on Nature Portfolio policies, see our [Editorial Policies](#) and the [Editorial Policy Checklist](#).

### Statistics

For all statistical analyses, confirm that the following items are present in the figure legend, table legend, main text, or Methods section.

n/a Confirmed

- The exact sample size ( $n$ ) for each experimental group/condition, given as a discrete number and unit of measurement
- A statement on whether measurements were taken from distinct samples or whether the same sample was measured repeatedly
- The statistical test(s) used AND whether they are one- or two-sided  
*Only common tests should be described solely by name; describe more complex techniques in the Methods section.*
- A description of all covariates tested
- A description of any assumptions or corrections, such as tests of normality and adjustment for multiple comparisons
- A full description of the statistical parameters including central tendency (e.g. means) or other basic estimates (e.g. regression coefficient) AND variation (e.g. standard deviation) or associated estimates of uncertainty (e.g. confidence intervals)
- For null hypothesis testing, the test statistic (e.g.  $F$ ,  $t$ ,  $r$ ) with confidence intervals, effect sizes, degrees of freedom and  $P$  value noted  
*Give  $P$  values as exact values whenever suitable.*
- For Bayesian analysis, information on the choice of priors and Markov chain Monte Carlo settings
- For hierarchical and complex designs, identification of the appropriate level for tests and full reporting of outcomes
- Estimates of effect sizes (e.g. Cohen's  $d$ , Pearson's  $r$ ), indicating how they were calculated

*Our web collection on [statistics for biologists](#) contains articles on many of the points above.*

### Software and code

Policy information about [availability of computer code](#)

#### Data collection

BD FACSDiva v9.0.1 was used to collect flow cytometry data.  
 ABSciex Analyst v1.6.3 was used for the ABSciex 5500 hybrid triple quadrupole/linear ion trap mass spectrometer.  
 Thermo XCalibur 4.1.50 was used for the Thermo Qexactive HF hybrid quadrupole-Orbitrap mass spectrometer.  
 HiSeq Control v2.0.12 for Illumina HiSeq 1500 and HiSeq 2000.  
 NextSeq Control v2.2.0 for Illumina NextSeq 500.  
 Agilent Wave v2.3 was used for Agilent Seahorse XFe96 Analyzer.  
 Siemens Inveon Acquisition Workplace v2.0 was used for PET/CT acquisition.  
 Bruker Paravision v6.1 was used for acquisition of hyperpolarized  $^{13}\text{C}$  magnetic resonance imaging.

#### Data analysis

Methods describe the software used to analyze RNA-seq, ATAC-seq, ChIP-seq and Whole-Genome sequencing data in detail and are publicly available.  
 Flowjo v9.3.2 or higher was for flow cytometry.  
 R v3.5.0 or higher was used for statistics.  
 ABSciex MultiQuant v2.1.1. was used for analysis of metabolomics data.  
 Skyline v4.2 was used for analysis of histone PTM peaks.  
 Siemens Inveon Research Workplace v4.2 was used for PET/CT analysis.  
 ImageJ v1.52m for quantification of western blot densities.  
 MathWorks Matlab v.8.5 was used for hyperpolarized  $^{13}\text{C}$  magnetic resonance imaging and the used Matlab code is available upon request.  
 MiXCR v2.1.10 was used to identify T cell receptor sequences from RNA-seq data

## Data

Policy information about [availability of data](#)

All manuscripts must include a [data availability statement](#). This statement should provide the following information, where applicable:

- Accession codes, unique identifiers, or web links for publicly available datasets
- A description of any restrictions on data availability
- For clinical datasets or third party data, please ensure that the statement adheres to our [policy](#)

All data are available from the corresponding authors upon reasonable request. For mouse data, RNA-sequencing, ATAC-sequencing and ChIP-sequencing data have been deposited in the Gene Expression Omnibus database (GEO) with accessions GSE212832, GSE213180, and GSE1835530. For human data, whole genome sequencing, RNA-sequencing and ATAC-sequencing data for consenting patients is deposited in the database of Genotypes and Phenotypes (dbGaP) under the accession codes phs002456.v1 (for previously published data in Park et al, 2021) and phs003312.

## Human research participants

Policy information about [studies involving human research participants and Sex and Gender in Research](#).

|                             |                                                                                                                                                                                                                                                                                                                                                  |
|-----------------------------|--------------------------------------------------------------------------------------------------------------------------------------------------------------------------------------------------------------------------------------------------------------------------------------------------------------------------------------------------|
| Reporting on sex and gender | The sex of each patient is reported in Supplemental Table 1. Both male and female patients were analyzed, but sex-specific analyses were not performed due to limitations in the number of patients total.                                                                                                                                       |
| Population characteristics  | Relevant characteristics including ethnicity, sex, age at diagnosis, and the clinical diagnoses are indicated in Supplemental Table 1. This information was determined through patient medical records.                                                                                                                                          |
| Recruitment                 | Patients diagnosed with cutaneous T cell lymphoma and who had sufficient stored samples for analysis were included in this study. Participants were recruited through the cutaneous lymphoma clinic at Northwestern University and provided informed consent. This study was approved by the Northwestern University Institutional Review Board. |
| Ethics oversight            | Study protocol was approved by the Northwestern University Institutional Review Board.                                                                                                                                                                                                                                                           |

Note that full information on the approval of the study protocol must also be provided in the manuscript.

## Field-specific reporting

Please select the one below that is the best fit for your research. If you are not sure, read the appropriate sections before making your selection.

- Life sciences       Behavioural & social sciences       Ecological, evolutionary & environmental sciences

For a reference copy of the document with all sections, see [nature.com/documents/nr-reporting-summary-flat.pdf](https://www.nature.com/documents/nr-reporting-summary-flat.pdf)

## Life sciences study design

All studies must disclose on these points even when the disclosure is negative.

|                 |                                                                                                                                                                                                               |
|-----------------|---------------------------------------------------------------------------------------------------------------------------------------------------------------------------------------------------------------|
| Sample size     | Samples sizes were not pre-determined based on statistical power calculations but were based on our experience with these assays.                                                                             |
| Data exclusions | No data were excluded.                                                                                                                                                                                        |
| Replication     | The number of independent experiments and biological replicates for each data panel is indicated in the figure panels. For human samples, repetition was not always possible due to limited patient material. |
| Randomization   | No randomization techniques were used. However, samples were allocated randomly to experiments and processed in an arbitrary order.                                                                           |
| Blinding        | The investigators were not blinded to group allocation during data collection or analysis, as there was no subjective measurement in our experiments.                                                         |

## Reporting for specific materials, systems and methods

We require information from authors about some types of materials, experimental systems and methods used in many studies. Here, indicate whether each material, system or method listed is relevant to your study. If you are not sure if a list item applies to your research, read the appropriate section before selecting a response.

## Materials &amp; experimental systems

## Methods

| n/a                                 | Involved in the study                                           |
|-------------------------------------|-----------------------------------------------------------------|
| <input type="checkbox"/>            | <input checked="" type="checkbox"/> Antibodies                  |
| <input type="checkbox"/>            | <input checked="" type="checkbox"/> Eukaryotic cell lines       |
| <input checked="" type="checkbox"/> | <input type="checkbox"/> Palaeontology and archaeology          |
| <input type="checkbox"/>            | <input checked="" type="checkbox"/> Animals and other organisms |
| <input type="checkbox"/>            | <input checked="" type="checkbox"/> Clinical data               |
| <input checked="" type="checkbox"/> | <input type="checkbox"/> Dual use research of concern           |

| n/a                                 | Involved in the study                              |
|-------------------------------------|----------------------------------------------------|
| <input type="checkbox"/>            | <input checked="" type="checkbox"/> ChIP-seq       |
| <input type="checkbox"/>            | <input checked="" type="checkbox"/> Flow cytometry |
| <input checked="" type="checkbox"/> | <input type="checkbox"/> MRI-based neuroimaging    |

## Antibodies

## Antibodies used

The following antibodies were used for western blotting (1:1000):  
 hexokinase 2 (clone epr20839, ab209847, Abcam)  
 phosphofructokinase-1/PFKM (clone 842735, MAB7687-SP, R&D Systems)  
 aldolase A (clone D73H4, 8060, CST)  
 enolase 1 (3810T, CST)  
 actin (clone 8H10D10, 3700, CST)  
 histone H3 (9715, CST)  
 acetyl-histone H3 Lys27 (clone D5E4, 8173, CST)

histone H4 (clone L64C1, 2935, CST)  
 acetyl-histone H4 (06-598, Millipore)  
 ACLY (4332, CST)  
 p-ACLY (4331, CST)  
 AKT (clone C67E7, 4691, CST)  
 p-AKT (clone D9E, 4060, CST)

The following antibodies were used for flow cytometry of murine cells:  
 CD4 (clone GK1.5, 100437, BioLegend); 1:300  
 p-AKTS473 (clone SDRNR, 48-9715-42, Thermo) ; 1:100  
 p-mTORS2448 (2971, CST) ; 1:100  
 hexokinase 2 (clone epr20839, ab209847, Abcam) ; 1:100  
 glut 1 (21829-1-AP, Proteintech) ; 1:100  
 p-S6S240/244 (clone D68F8, 5364S, CST) ; 1:100  
 acetyl-histone H3 Lys27 (clone D5E4, 13027, CST) ; 1:100  
 HIF1 $\alpha$  (clone D1S7W, 36169, CST) ; 1:100  
 p-c-Jun (9164, CST) ; 1:100  
 p-c-Fos (clone D82C12, 5348, CST) ; 1:100

The following antibodies were used as secondary antibodies for mouse cells:  
 PE donkey anti-rabbit IgG (406421, Biolegend) ; 1:300  
 PE goat anti-mouse IgG (405307, Biolegend) ; 1:300

The following antibodies were used for flow cytometry of human cells:  
 Pacific blue CD3 (317313, BioLegend) ; 1:300  
 APC CD3 (clone OKT3, 317318, BioLegend) ; 1:300  
 PerCPy5.5 CD8 (clone RPA-T8, 45-0088-42, eBioscience) ; 1:300  
 PE CD26 (clone BA5b, 302705, Biolegend) ; 1:300  
 PE TCR V $\beta$ 2 (clone REA654, 130-110-095, Miltenyi) ; 1:300  
 FITC TCR V $\beta$ 13 (clone H131, 11-5792-41, eBioscience) ; 1:300  
 PE TCR V $\beta$ 14 (clone REA557, 130-108-804, Miltenyi) ; 1:300  
 PE TCR V $\beta$ 17 (clone E17.5F3.15.13, 1M2048, Beckman Coulter) ; 1:300  
 anti-p-S6S240/244 (clone D68F8, 5364S, CST), AF488 p-c-JunS73 (clone D47G9, 12714, CST); 1:100

The following antibodies were used as secondary antibodies for human cells:  
 AlexaFluor647 anti-rabbit IgG Fab2 (4414S, CST) ; 1:300

The following antibodies were used for ChIP-seq (amount see methods section):  
 H3K27ac (C15410174, Diagenode)  
 H2Av (clone 10E9.D1, 61686, Active Motif)

## Validation

All antibodies are commercially available and have been validated by the manufacturer for the applications used in our experiments as indicated on the websites:

## Western blotting, mouse:

hexokinase 2 (ab209847, Abcam) <https://www.abcam.com/hexokinase-ii-antibody-epr20839-ab209847.html>  
 phosphofructokinase-1/PFKM (MAB7687-SP, R&D Systems) [https://www.rndsystems.com/products/human-mouse-rat-muscle-phosphofructokinase-pfkm-antibody-842735\\_mab7687](https://www.rndsystems.com/products/human-mouse-rat-muscle-phosphofructokinase-pfkm-antibody-842735_mab7687)  
 aldolase A (8060, CST) <https://www.cellsignal.com/products/primary-antibodies/aldolase-a-d73h4-rabbit-mab/8060>  
 enolase 1 (3810T, CST) <https://www.cellsignal.com/products/primary-antibodies/enolase-1-antibody/3810>

AMPK (5832, CST) <https://www.cellsignal.com/products/primary-antibodies/ampka-d63g4-rabbit-mab/5832>  
 tubulin (2144, CST) <https://www.cellsignal.com/products/primary-antibodies/a-tubulin-antibody/2144>  
 histone H3 (9715, CST) <https://www.cellsignal.com/products/primary-antibodies/histone-h3-antibody/9715>  
 acetyl-histone H3 Lys27 (8173, CST) <https://www.cellsignal.com/products/primary-antibodies/acetyl-histone-h3-lys27-d5e4-xp-rabbit-mab/8173>  
 histone H4 (2935, CST) <https://www.cellsignal.com/products/primary-antibodies/histone-h4-l64c1-mouse-mab/2935>  
 acetyl-histone H4 (06-598, Millipore) [https://www.emdmillipore.com/US/en/product/Anti-acetyl-Histone-H4-Antibody,MM\\_NF-06-598](https://www.emdmillipore.com/US/en/product/Anti-acetyl-Histone-H4-Antibody,MM_NF-06-598)  
 ACLY (4332, CST) <https://www.cellsignal.com/products/primary-antibodies/atp-citrate-lyase-antibody/4332>  
 p-ACLY (4331, CST) <https://www.cellsignal.com/products/primary-antibodies/phospho-atp-citrate-lyase-ser455-antibody/4331>  
 AKT (4691, CST) <https://www.cellsignal.com/products/primary-antibodies/akt-pan-c67e7-rabbit-mab/4691>  
 p-AKT (4060, CST) <https://www.cellsignal.com/products/primary-antibodies/phospho-akt-ser473-d9e-xp-rabbit-mab/4060>

Flow cytometry, mouse:  
 BV421 CD4 (100437, BioLegend) <https://www.biolegend.com/en-us/search-results/brilliant-violet-421-anti-mouse-cd4-antibody-7142>  
 eFluor 450 p-AKTs473 (48-9715-42, Thermo) <https://www.thermofisher.com/antibody/product/Phospho-AKT1-Ser473-Antibody-clone-SDRNR-Monoclonal/48-9715-42>  
 p-mTORS2448 (2971, CST) <https://www.cellsignal.com/products/primary-antibodies/phospho-rtor-ser2448-antibody/2971>  
 hexokinase 2 (ab209847, Abcam) <https://www.abcam.com/hexokinase-ii-antibody-epr20839-ab209847.html>  
 glut 1 (21829-1-AP, Proteintech) <https://www.ptglab.com/products/SLC2A1, GLUT1-Antibody-21829-1-AP.htm>  
 p-S6S240/244 (5364S, CST) <https://www.cellsignal.com/products/primary-antibodies/phospho-s6-ribosomal-protein-ser240-244-d68f8-xp-rabbit-mab/5364>  
 Alexa Fluor 555 acetyl-histone H3 Lys27 (13027, CST) <https://www.cellsignal.com/products/antibody-conjugates/acetyl-histone-h3-lys27-d5e4-xp-rabbit-mab-alexa-fluor-555-conjugate/13027>  
 HIF1 $\alpha$  (36169, CST) <https://www.cellsignal.com/products/primary-antibodies/hif-1a-d1s7w-xp-rabbit-mab/36169>  
 p-c-Jun (9164, CST) <https://www.cellsignal.com/products/primary-antibodies/phospho-c-jun-ser73-antibody/9164>

p-c-Fos (5348, CST) <https://www.cellsignal.com/products/primary-antibodies/phospho-c-fos-ser32-d82c12-xp-rabbit-mab/5348>

PE donkey anti-rabbit IgG (406421, Biolegend) <https://www.biolegend.com/en-us/products/pe-donkey-anti-rabbit-igg-minimal-x-reactivity-9751?GroupID=BLG3472>  
 PE goat anti-mouse IgG (405307, Biolegend) <https://www.biolegend.com/en-us/products/pe-goat-anti-mouse-igg-minimal-x-reactivity-1418>

Flow cytometry, human:  
 Pacific blue CD3 (317313, BioLegend) <https://www.biolegend.com/en-us/products/pacific-blue-anti-human-cd3-antibody-3648?GroupID=BLG4203>  
 APC CD3 (317318, BioLegend) <https://www.biolegend.com/en-gb/search-results/apc-anti-human-cd3-antibody-6198>  
 PerCPCy5.5 CD8a (45-0088-42, eBioscience) <https://www.thermofisher.com/antibody/product/CD8a-Antibody-clone-RPA-T8-Monoclonal/45-0088-42>  
 PE CD26 (302705, Biolegend) <https://www.biolegend.com/en-us/products/pe-anti-human-cd26-antibody-611?GroupID=BLG1985>  
 PE TCR  $\nu\beta$ 2 (130-110-095, Miltenyi) <https://www.miltenyibiotec.com/US-en/products/tcr-vb2-antibody-anti-human-reafinity-rea654.html#gref>  
 FITC TCR  $\nu\beta$ 13 (11-5792-41, eBioscience) <https://www.thermofisher.com/antibody/product/TCR-V-beta-13-1-Antibody-clone-H131-Monoclonal/11-5792-41>  
 PE TCR  $\nu\beta$ 14 (130-108-804, Miltenyi) <https://www.miltenyibiotec.com/US-en/products/tcr-vb14-antibody-anti-human-reafinity-rea557.html#gref>  
 PE TCR  $\nu\beta$ 17 (IM2048, Beckman Coulter) <https://www.beckman.com/reagents/coulter-flow-cytometry/antibodies-and-kits/single-color-antibodies/tcr-vb17/im2048>  
 anti-p-S6S240/244 (5364S, CST) <https://www.cellsignal.com/products/primary-antibodies/phospho-s6-ribosomal-protein-ser240-244-d68f8-xp-rabbit-mab/5364>  
 Alexa Fluor 647 anti-rabbit IgG Fab2 (4414S, CST) <https://www.cellsignal.com/products/secondary-antibodies/anti-rabbit-igg-h-l-f-ab-2-fragment-alexa-fluor-647-conjugate/4414>

ChIP-seq, mouse:  
 H3K27ac (C15410174, Diagenode) <https://www.diagenode.com/en/p/h3k27ac-polyclonal-antibody-classic-50-mg-42-ml>

ChIP-seq, drosophila:  
 H2Av (61686, Active Motif) <https://www.activemotif.com/catalog/details/61751/histone-h2av-antibody-mab-clone-10e9-d1>

## Eukaryotic cell lines

Policy information about [cell lines and Sex and Gender in Research](#)

|                                                                   |                                                                                                |
|-------------------------------------------------------------------|------------------------------------------------------------------------------------------------|
| Cell line source(s)                                               | The Jurkat and Raji cell lines used in this study were purchased from ATCC.                    |
| Authentication                                                    | All cell lines were authenticated by STR profiling.                                            |
| Mycoplasma contamination                                          | All cell lines were routinely tested for mycoplasma infection. The tests were always negative. |
| Commonly misidentified lines (See <a href="#">ICLAC</a> register) | No commonly misidentified cell line was used.                                                  |

## Palaeontology and Archaeology

|                                                                                                                                                 |     |
|-------------------------------------------------------------------------------------------------------------------------------------------------|-----|
| Specimen provenance                                                                                                                             | N/A |
| Specimen deposition                                                                                                                             | N/A |
| Dating methods                                                                                                                                  | N/A |
| <input type="checkbox"/> Tick this box to confirm that the raw and calibrated dates are available in the paper or in Supplementary Information. |     |
| Ethics oversight                                                                                                                                | N/A |

Note that full information on the approval of the study protocol must also be provided in the manuscript.

## Animals and other research organisms

Policy information about [studies involving animals](#); [ARRIVE guidelines](#) recommended for reporting animal research, and [Sex and Gender in Research](#)

|                         |                                                                                                                                                                                                                                                                                                                                                                                                                                                                                                                            |
|-------------------------|----------------------------------------------------------------------------------------------------------------------------------------------------------------------------------------------------------------------------------------------------------------------------------------------------------------------------------------------------------------------------------------------------------------------------------------------------------------------------------------------------------------------------|
| Laboratory animals      | Mice of both sexes aged 6-12 weeks were used for all experiments. Littermate controls were used whenever possible. Randomization and blinding were not performed. ITK-SYKCD4-creERT2 and ITK-SYKCD4-creERT2;Pdc1 <sup>-/-</sup> animals were described earlier and maintained on a C57BL/6 genetic background. Pdc1 <sup>-/-</sup> (02827677), B6J.129(Cg)-Gt(ROSA)26Sortm1.1(CAG-cas9*,-EGFP)Fezh/J (Cas9, 02617978), and NOD.CG-Prkdcscid IL2rgtm1Wjl/SzJ (NSG, 005557) mice were purchased from the Jackson Laboratory. |
| Wild animals            | No wild animals were used.                                                                                                                                                                                                                                                                                                                                                                                                                                                                                                 |
| Reporting on sex        | For peripheral T-cell lymphomas both sexes showing nearly identical trends in survival, although incidence rates are higher in males compared to females (seer.cancer.gov). In accordance with this, we used both female and male mice. We indicate also that our mouse models did not reveal any differences in PD-1 expression and survival after PD-1 inactivation based upon sex. We used the same numbers of male and female mice in each experiment whenever possible.                                               |
| Field-collected samples | No field-collected samples were used.                                                                                                                                                                                                                                                                                                                                                                                                                                                                                      |
| Ethics oversight        | All animal experiments were performed in accordance with local guidelines (Regierung von Oberbayern, Munich, Germany). Mice were euthanized if they exhibited signs of lymphoma (lymph node enlargement, palpable tumor, labored breathing, ascites) or if they lost 20% or more of their body weight. None of the approved thresholds were exceeded at any time.                                                                                                                                                          |

Note that full information on the approval of the study protocol must also be provided in the manuscript.

## Clinical data

Policy information about [clinical studies](#)

All manuscripts should comply with the ICMJE [guidelines for publication of clinical research](#) and a completed [CONSORT checklist](#) must be included with all submissions.

|                             |                                                                                                                                  |
|-----------------------------|----------------------------------------------------------------------------------------------------------------------------------|
| Clinical trial registration | Although this study includes clinical data, this study is not a clinical trial.                                                  |
| Study protocol              | Clinical trial study protocols were not utilized. Ethical approval for this study was obtained from institutional review boards. |
| Data collection             | Clinical data was obtained from the electronic medical records of each patient, when available.                                  |
| Outcomes                    | We did not predefine outcomes in this study as in a clinical trial.                                                              |

## Dual use research of concern

Policy information about [dual use research of concern](#)

### Hazards

Could the accidental, deliberate or reckless misuse of agents or technologies generated in the work, or the application of information presented in the manuscript, pose a threat to:

- |                                     |                          |                            |
|-------------------------------------|--------------------------|----------------------------|
| No                                  | Yes                      |                            |
| <input checked="" type="checkbox"/> | <input type="checkbox"/> | Public health              |
| <input checked="" type="checkbox"/> | <input type="checkbox"/> | National security          |
| <input checked="" type="checkbox"/> | <input type="checkbox"/> | Crops and/or livestock     |
| <input checked="" type="checkbox"/> | <input type="checkbox"/> | Ecosystems                 |
| <input checked="" type="checkbox"/> | <input type="checkbox"/> | Any other significant area |

## Experiments of concern

Does the work involve any of these experiments of concern:

- |                                     |                          |                                                                             |
|-------------------------------------|--------------------------|-----------------------------------------------------------------------------|
| No                                  | Yes                      |                                                                             |
| <input checked="" type="checkbox"/> | <input type="checkbox"/> | Demonstrate how to render a vaccine ineffective                             |
| <input checked="" type="checkbox"/> | <input type="checkbox"/> | Confer resistance to therapeutically useful antibiotics or antiviral agents |
| <input checked="" type="checkbox"/> | <input type="checkbox"/> | Enhance the virulence of a pathogen or render a nonpathogen virulent        |
| <input checked="" type="checkbox"/> | <input type="checkbox"/> | Increase transmissibility of a pathogen                                     |
| <input checked="" type="checkbox"/> | <input type="checkbox"/> | Alter the host range of a pathogen                                          |
| <input checked="" type="checkbox"/> | <input type="checkbox"/> | Enable evasion of diagnostic/detection modalities                           |
| <input checked="" type="checkbox"/> | <input type="checkbox"/> | Enable the weaponization of a biological agent or toxin                     |
| <input checked="" type="checkbox"/> | <input type="checkbox"/> | Any other potentially harmful combination of experiments and agents         |

## ChIP-seq

### Data deposition

- Confirm that both raw and final processed data have been deposited in a public database such as [GEO](#).
- Confirm that you have deposited or provided access to graph files (e.g. BED files) for the called peaks.

Data access links

*May remain private before publication.*

<https://www.ncbi.nlm.nih.gov/geo/query/acc.cgi?acc=GSE183530>  
Secure token: qvknyccjdsrxcv

Files in database submission

Raw data files:  
 GS1296\_WT\_H3K27ac.r1\_ATCACGTT.fastq.gz  
 GS1301\_WT\_H3K27ac.r2\_GCCAATGT.fastq.gz  
 GS1297\_KO\_H3K27ac.r1\_CGATGTTT.fastq.gz  
 GS1302\_KO\_H3K27ac.r2\_CAGATCTG.fastq.gz

Processed data files:  
 GS1296\_WT\_H3K27ac.r1\_m1\_filtered\_nodups.ucsc.bigWig  
 GS1301\_WT\_H3K27ac.r2\_m1\_filtered\_nodups.ucsc.bigWig  
 GS1297\_KO\_H3K27ac.r1\_m1\_filtered\_nodups.ucsc.bigWig  
 GS1302\_KO\_H3K27ac.r2\_m1\_filtered\_nodups.ucsc.bigWig

Genome browser session

(e.g. [UCSC](#))

[https://genome.ucsc.edu/s/timwartewig/PD1\\_Metab](https://genome.ucsc.edu/s/timwartewig/PD1_Metab)

### Methodology

Replicates

For each genotype, we used two biological replicates

Sequencing depth

Read length: 50bp, single-end

Sample: GS1296\_WT\_H3K27ac.r1\_ATCACGTT  
 Total Reads: 42284243  
 Uniquely mapped reads to mm9: 4806047  
 Uniquely mapped reads to dm6: 977936

Sample: GS1297\_KO\_H3K27ac.r1\_CGATGTTT  
 Total Reads: 46328389  
 Uniquely mapped reads to mm9: 38253486  
 Uniquely mapped reads to dm6: 684970

Sample: GS1301\_WT\_H3K27ac.r2\_GCCAATGT  
 Total Reads: 47574042  
 Uniquely mapped reads to mm9: 38620617  
 Uniquely mapped reads to dm6: 1108937

|                         |                                                                                                                                                                                                                                                                                                                                                                                                                                                                                                                                                                                                                 |
|-------------------------|-----------------------------------------------------------------------------------------------------------------------------------------------------------------------------------------------------------------------------------------------------------------------------------------------------------------------------------------------------------------------------------------------------------------------------------------------------------------------------------------------------------------------------------------------------------------------------------------------------------------|
|                         | <p>Sample: GS1302_KO_H3K27ac.r2_CAGATCTG<br/>         Total Reads: 49311683<br/>         Uniquely mapped reads to mm9: 38934676<br/>         Uniquely mapped reads to dm6: 677615</p>                                                                                                                                                                                                                                                                                                                                                                                                                           |
| Antibodies              | <p>H3K27ac (C15410174, Diagenode), polyclonal, Lot A7071-001P, <a href="https://www.diagenode.com/en/p/h3k27ac-polyclonal-antibody-classic-50-mg-42-ml">https://www.diagenode.com/en/p/h3k27ac-polyclonal-antibody-classic-50-mg-42-ml</a><br/>         H2Av (61686, Active Motif), clone 10E9.D1, <a href="https://www.activemotif.com/catalog/details/61751/histone-h2av-antibody-mab-clone-10e9-d1">https://www.activemotif.com/catalog/details/61751/histone-h2av-antibody-mab-clone-10e9-d1</a></p>                                                                                                        |
| Peak calling parameters | <p>The reads were aligned to the mouse genome (mm9) using the Bowtie2 alignment package:<br/>         bowtie2 -p 20 -x ./bowtie2-mm9/bowtie-mm9 -U input.sam</p> <p>Aligned reads were sorted and indexed using Samtools (v1.11):<br/>         samtools view -S -b input.sam &gt; input.bam<br/>         samtools sort input.bam -o input.sorted.bam -@ 20</p> <p>Peaks were called using the MACS2 package (v2.2.7.1) with the calling parameters: macs2 callpeak --broad --broad-cutoff 0.1</p>                                                                                                               |
| Data quality            | <p>Spike-in normalisation was used to ensure properly normalised reads after immuno-precipitation and library preparation. FastQC was used to perform quality control for fastq files. Aligned bam files were visualised via IGV to ensure proper coverage across samples and different loci.<br/>         Peaks were called with MACS2 and cross verified.<br/>         Peaks above 5-fold enrichment:<br/>         GS1296_WT_H3K27ac.r1_ATCACGTT 39365<br/>         GS1301_WT_H3K27ac.r2_GCCAATGT 38297<br/>         GS1297_KO_H3K27ac.r1_CGATGTTT 39949<br/>         GS1302_KO_H3K27ac.r2_CAGATCTG 38888</p> |
| Software                | <p>For differential analysis, the peaks were called using the MACS2 package (v2.2.7.1). DiffBind (v2.6.6.2) was used for differential analysis using the built-in spike-in (Drosophila) normalization option. GSEA for ChIP-seq peak data was performed using the chip-enrich package (v2.0.1).</p>                                                                                                                                                                                                                                                                                                             |

## Flow Cytometry

### Plots

Confirm that:

- The axis labels state the marker and fluorochrome used (e.g. CD4-FITC).
- The axis scales are clearly visible. Include numbers along axes only for bottom left plot of group (a 'group' is an analysis of identical markers).
- All plots are contour plots with outliers or pseudocolor plots.
- A numerical value for number of cells or percentage (with statistics) is provided.

### Methodology

|                           |                                                                                                                                                                                                                                                                                                                                                                                                                                                                                                                                                                                                                                                                                                                                                                                                                                                                                                                                                                                                                                                                                                                                                                                                                                                                                                                               |
|---------------------------|-------------------------------------------------------------------------------------------------------------------------------------------------------------------------------------------------------------------------------------------------------------------------------------------------------------------------------------------------------------------------------------------------------------------------------------------------------------------------------------------------------------------------------------------------------------------------------------------------------------------------------------------------------------------------------------------------------------------------------------------------------------------------------------------------------------------------------------------------------------------------------------------------------------------------------------------------------------------------------------------------------------------------------------------------------------------------------------------------------------------------------------------------------------------------------------------------------------------------------------------------------------------------------------------------------------------------------|
| Sample preparation        | <p>Mouse sample preparation: Spleens and lymph nodes were gently ground under nylon mesh using the flat end of a 3-mL syringes. Red blood cells were removed by ACK lysing buffer, followed by washing cells with FACS staining buffer (PBS containing 2% FCS). Cells were then filtered, pelleted and stained for FACS or, depending on the experiment, incubated in vitro and subsequently stained for FACS. As described in the methods, fixation and permeabilization was performed prior to staining for the indicated experiments. Collected murine peripheral blood was directly mixed with ACK lysing buffer, followed by washing cells with FACS staining buffer and staining for FACS.</p> <p>Human sample preparation:<br/>         Peripheral blood mononuclear cells (PBMCs) were isolated from the blood of patients with leukemic CTCL by Ficoll-Hypaque gradient centrifugation. Leukemic cells were sorted by FACS using cell surface markers that uniquely identified the neoplastic clones. If the antibody to TCRV<math>\beta</math> was available, we isolated the CD3+TCRV<math>\beta</math>+CD8<math>^-</math> population. If not, we isolated CD3+CD26<math>^-</math>CD8<math>^-</math> cells. We found that the mutational spectra of cells were similar, regardless of the method of isolation.</p> |
| Instrument                | BD FACSCanto II, BD LSRFortessa, BD LSRII, BD FACSAria Fusion, BD FACSAria 5,                                                                                                                                                                                                                                                                                                                                                                                                                                                                                                                                                                                                                                                                                                                                                                                                                                                                                                                                                                                                                                                                                                                                                                                                                                                 |
| Software                  | BD FACSDiva 7.0 or higher for sample collection. FlowJo 9.3.2 or higher for FACS analysis.                                                                                                                                                                                                                                                                                                                                                                                                                                                                                                                                                                                                                                                                                                                                                                                                                                                                                                                                                                                                                                                                                                                                                                                                                                    |
| Cell population abundance | FACS sorted mouse cells had a purity >99%. FACS sorted CTCL cells had a median purity of >90%.                                                                                                                                                                                                                                                                                                                                                                                                                                                                                                                                                                                                                                                                                                                                                                                                                                                                                                                                                                                                                                                                                                                                                                                                                                |
| Gating strategy           | Based on the pattern of FSC-A/SSC-A, cells in the lymphocyte gate were used for analysis. Singlets were gated according to the pattern of FSC-H vs. FSC-A. Positive populations were determined by the specific antibodies, which were distinct from negative populations. Isotype control was used to distinguish between background and marker-positive events.                                                                                                                                                                                                                                                                                                                                                                                                                                                                                                                                                                                                                                                                                                                                                                                                                                                                                                                                                             |

- Tick this box to confirm that a figure exemplifying the gating strategy is provided in the Supplementary Information.

## Experimental design

|                                 |     |
|---------------------------------|-----|
| Design type                     | N/A |
| Design specifications           | N/A |
| Behavioral performance measures | N/A |

## Acquisition

|                               |                                                                            |
|-------------------------------|----------------------------------------------------------------------------|
| Imaging type(s)               | N/A                                                                        |
| Field strength                | N/A                                                                        |
| Sequence & imaging parameters | N/A                                                                        |
| Area of acquisition           | N/A                                                                        |
| Diffusion MRI                 | <input type="checkbox"/> Used <input checked="" type="checkbox"/> Not used |

## Preprocessing

|                            |     |
|----------------------------|-----|
| Preprocessing software     | N/A |
| Normalization              | N/A |
| Normalization template     | N/A |
| Noise and artifact removal | N/A |
| Volume censoring           | N/A |

## Statistical modeling & inference

|                                                                           |                                                                                                                  |
|---------------------------------------------------------------------------|------------------------------------------------------------------------------------------------------------------|
| Model type and settings                                                   | N/A                                                                                                              |
| Effect(s) tested                                                          | N/A                                                                                                              |
| Specify type of analysis:                                                 | <input type="checkbox"/> Whole brain <input checked="" type="checkbox"/> ROI-based <input type="checkbox"/> Both |
| Anatomical location(s)                                                    |                                                                                                                  |
| Statistic type for inference<br>(See <a href="#">Eklund et al. 2016</a> ) | N/A                                                                                                              |
| Correction                                                                | N/A                                                                                                              |

## Models & analysis

|                                     |                                                                       |
|-------------------------------------|-----------------------------------------------------------------------|
| n/a                                 | Involvement in the study                                              |
| <input checked="" type="checkbox"/> | <input type="checkbox"/> Functional and/or effective connectivity     |
| <input checked="" type="checkbox"/> | <input type="checkbox"/> Graph analysis                               |
| <input checked="" type="checkbox"/> | <input type="checkbox"/> Multivariate modeling or predictive analysis |
