# Supplementary material for: PD-1 instructs a tumor-suppressive metabolic program that restricts glycolysis and restrains AP-1 activity in T cell lymphoma
Source: PubMed Central journal article supplement (PMC10597841; doi:10.1038/s43018-023-00635-7), 2023-09-18

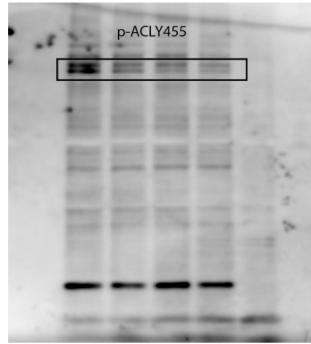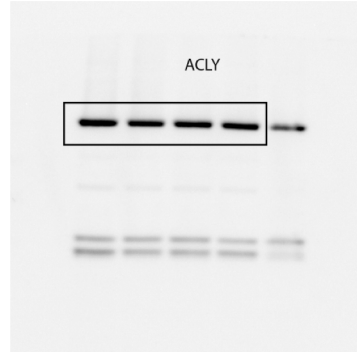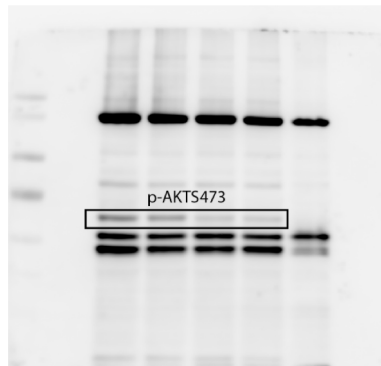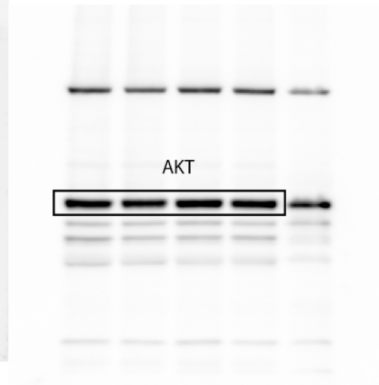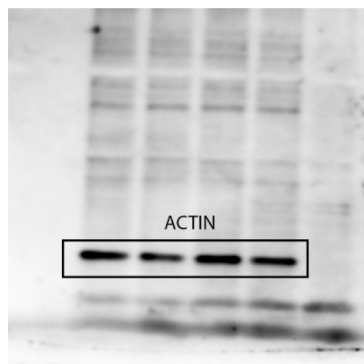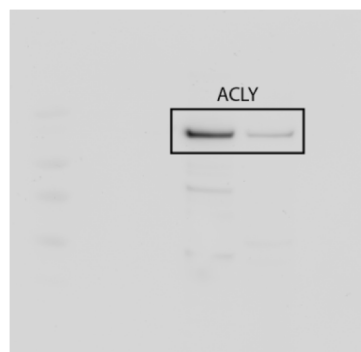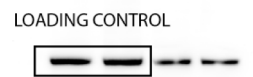

Supplement: 43018_2023_635_MOESM10_ESM.pdf [file 43018_2023_635_MOESM10_ESM.pdf]
